# Supplementary material for: Exploring the Motivational Roots of Getting Vaccinated against COVID-19 in a Population of Vaccinated Pediatric Healthcare Professionals: Evidence from an Italian Cross-Sectional Study
Source: MDPI journal article supplement (doi:10.3390/vaccines10030467), 2022-03-18

## **Supplementary Material**

### **1. Questionnaire (English version)**

**To start, we ask you some questions, in order to have a socio-demographic and professional profile**

#### **1. Gender:**

- ☐ Male
- ☐ Female

#### **2. Age: \_\_\_\_\_**

#### **3. Occupation:**

- ☐ Physician
- ☐ Nurse
- ☐ Obstetrician
- ☐ Allied healthcare workers
- ☐ Other: \_\_\_\_\_

**In this section, we present you some questions about the COVID-19 vaccine**

#### **4. If you think to the COVID-19 vaccine... (select one option):**

- ☐ a. I have already been vaccinated, first and second dose
- ☐ b. I have already been vaccinated, only the first dose
- ☐ c. I haven't been vaccinated yet, but I have already adhered to the vaccination campaign
- ☐ d. I haven't adhered to the vaccination campaign, but I will in the future
- ☐ e. I haven't decided on this yet
- ☐ f. I haven't adhered to the vaccination campaign, and I will not join in the future

(Filter: only if the respondent in question 4. have chosen a. or b. or c.)

**5. Below there are some possible reasons that could motivated people to get vaccinated against COVID-19. For each of the following reasons, indicate how much these incentives influenced your decision to get vaccinated against COVID-19, on a scale of 1 to 5 (from 1 -definitely not- to 5 -definitely yes)**

| Items                                                                     | Definitely not |   |   |   | Definitely yes |
|---------------------------------------------------------------------------|----------------|---|---|---|----------------|
| 1. Be convinced that the vaccine had been rigorously tested               | 1              | 2 | 3 | 4 | 5              |
| 2. To think that the health authorities were trustworthy on this argument | 1              | 2 | 3 | 4 | 5              |

|                                                                                           |   |   |   |   |   |
|-------------------------------------------------------------------------------------------|---|---|---|---|---|
| 3. Be convinced that getting vaccinated helped protect vulnerable members of my community | 1 | 2 | 3 | 4 | 5 |
| 4. The fact that a trusted health care worker suggest me to get vaccinated                | 1 | 2 | 3 | 4 | 5 |
| 5. The fact that someone I knew died due to COVID-19                                      | 1 | 2 | 3 | 4 | 5 |
| 6. The fact that someone I knew got sick with COVID-19                                    | 1 | 2 | 3 | 4 | 5 |
| 7. The fact that someone I knew was hospitalized due to COVID-19                          | 1 | 2 | 3 | 4 | 5 |
| 8. The fact that a trusted news source promoted the vaccine                               | 1 | 2 | 3 | 4 | 5 |
| 9. The fact that the President of the Republic or the Prime Minister promoted the vaccine | 1 | 2 | 3 | 4 | 5 |
| 10. The fact that the vaccination was promoted in my social media network                 | 1 | 2 | 3 | 4 | 5 |
| 11. Be convinced that the vaccine will serve to protect my health                         | 1 | 2 | 3 | 4 | 5 |

Thinking about when you did the anti-COVID-19 vaccine, state how much you felt the following emotional states using a scale from 0 (not at all) to 100 (a lot)

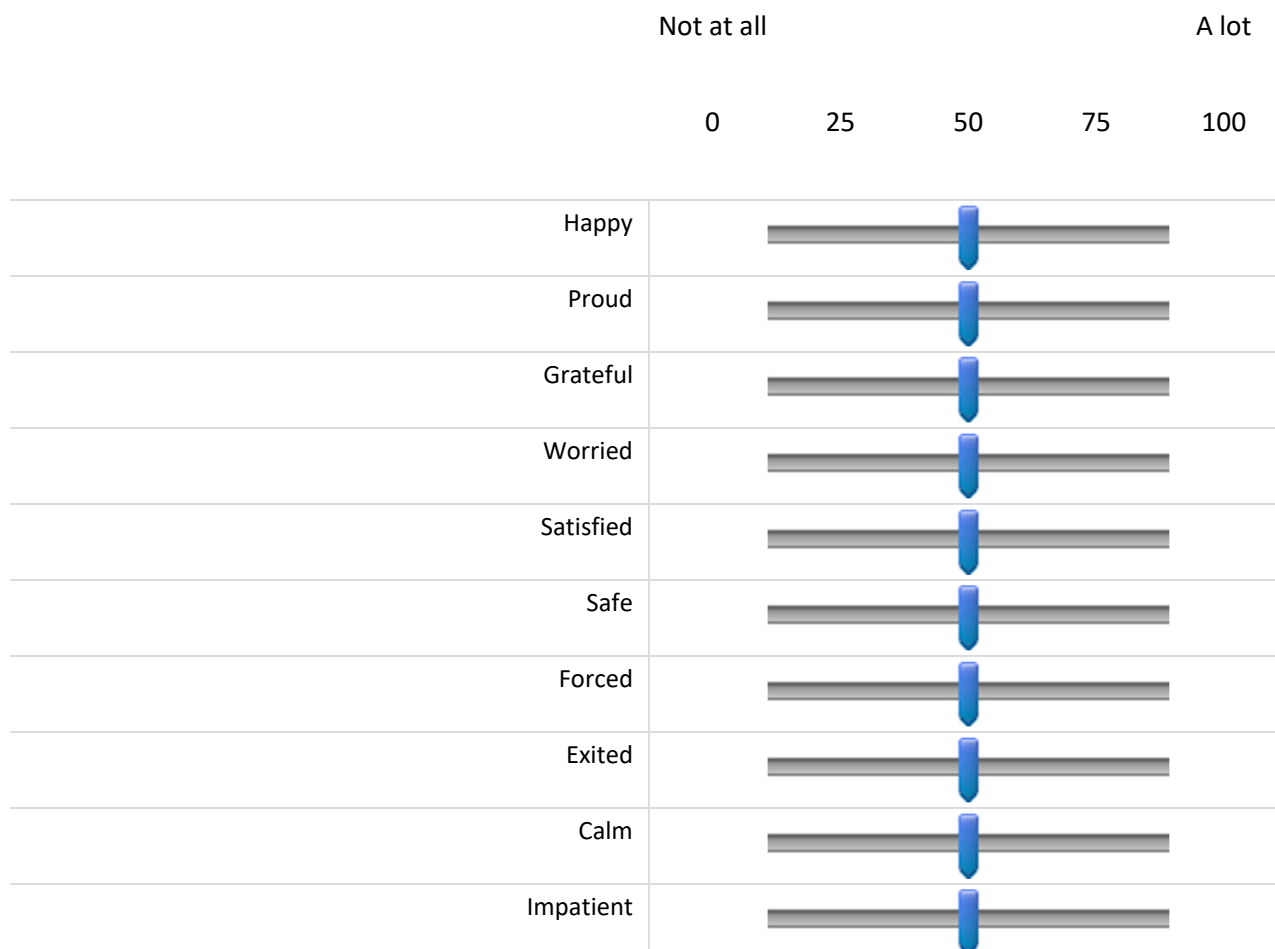

## 2. Questionnaire (Italian version)

*Per iniziare, le chiediamo di fornirci alcuni dati su di lei, al fine di avere un profilo socio-demografico e professionale:*

Genere:

☐ Uomo

☐ Donna

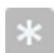

Età in anni compiuti (in cifre):

\_\_\_\_\_

Professione:

☐ Medico

☐ Infermiere/a

☐ Ostetrico/a

☐ OSS

☐ Altro \_\_\_\_\_

---

Pensando al vaccino contro il COVID-19 (selezioni una delle seguenti risposte):

- ☐ Ho già fatto il vaccino e il richiamo
- ☐ Ho già fatto il vaccino (solo la prima dose)
- ☐ Non sono ancora stato vaccinato, ma ho già aderito al piano vaccinale
- ☐ Non ho ancora aderito al piano vaccinale, ma sicuramente lo farò in futuro
- ☐ Non ho ancora deciso in merito
- ☐ Non ho ancora aderito al piano vaccinale, né lo farò in futuro

---

*Visualizza questa domanda:*

*If Pensando al vaccino contro il COVID-19 (selezioni una delle seguenti risposte): = Non ho ancora aderito al piano vaccinale, ma sicuramente lo farò in futuro*

*Or Pensando al vaccino contro il COVID-19 (selezioni una delle seguenti risposte): = Non ho ancora deciso in merito*

*Or Pensando al vaccino contro il COVID-19 (selezioni una delle seguenti risposte): = Non ho ancora aderito al piano vaccinale, né lo farò in futuro*

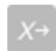

*Di seguito trova una serie di possibili motivazioni che potrebbero essere determinanti nello spingere le persone che hanno dubbi riguardo al vaccino anti-COVID-19 a vaccinarsi. Per ognuna delle seguenti motivazioni, indichi quanto ritiene che ognuno di questi incentivi potrebbe aumentare la probabilità che lei*

decida di vaccinarsi contro il COVID-19, su una scala da 1 a 5 (dove 1=decisamente no; 5= decisamente si). ***Mi motiverebbe a fare il vaccino...***

|                                                                                                         | 1 Decisamente<br>No   | 2                     | 3                     | 4                     | 5 Decisamente<br>sì   |
|---------------------------------------------------------------------------------------------------------|-----------------------|-----------------------|-----------------------|-----------------------|-----------------------|
| ... se fossi convinto che il vaccino sia stato rigorosamente testato                                    | <input type="radio"/> |
| ... se pensassi che le autorità sanitarie siano affidabili                                              | <input type="radio"/> |
| ... se fossi convinto che farsi vaccinare aiutasse a proteggere i membri vulnerabili della mia comunità | <input type="radio"/> |
| ... se un operatore sanitario di fiducia mi dicesse di vaccinarci                                       | <input type="radio"/> |
| ... se un mio conoscente fosse morto a causa di COVID-19                                                | <input type="radio"/> |
| ... se un mio conoscente fosse ricoverato in ospedale a causa di COVID-19                               | <input type="radio"/> |
| ... se una testata giornalistica di cui mi fido promuovesse la vaccinazione                             | <input type="radio"/> |
| ... se il Presidente della Repubblica o il Presidente del Consiglio promuovessero il vaccino            | <input type="radio"/> |
| ... se la vaccinazione venisse promossa nella mia rete di amici dei social network                      | <input type="radio"/> |

... se fossi  
convinto che il  
vaccino servisse a  
tutelare la mia  
salute

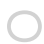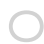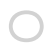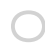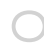

Interruzione di  
pagina



Visualizza questa domanda:

*If Pensando al vaccino contro il COVID-19 (selezioni una delle seguenti risposte): = Ho già fatto il vaccino e il richiamo*

*Or Pensando al vaccino contro il COVID-19 (selezioni una delle seguenti risposte): = Ho già fatto il vaccino (solo la prima dose)*

Pensando a quando si è sottoposto al vaccino anti-Covid19, indichi quanto si è sentito nei seguenti stati usando la scala da 0 (per nulla) a 100 (molto):

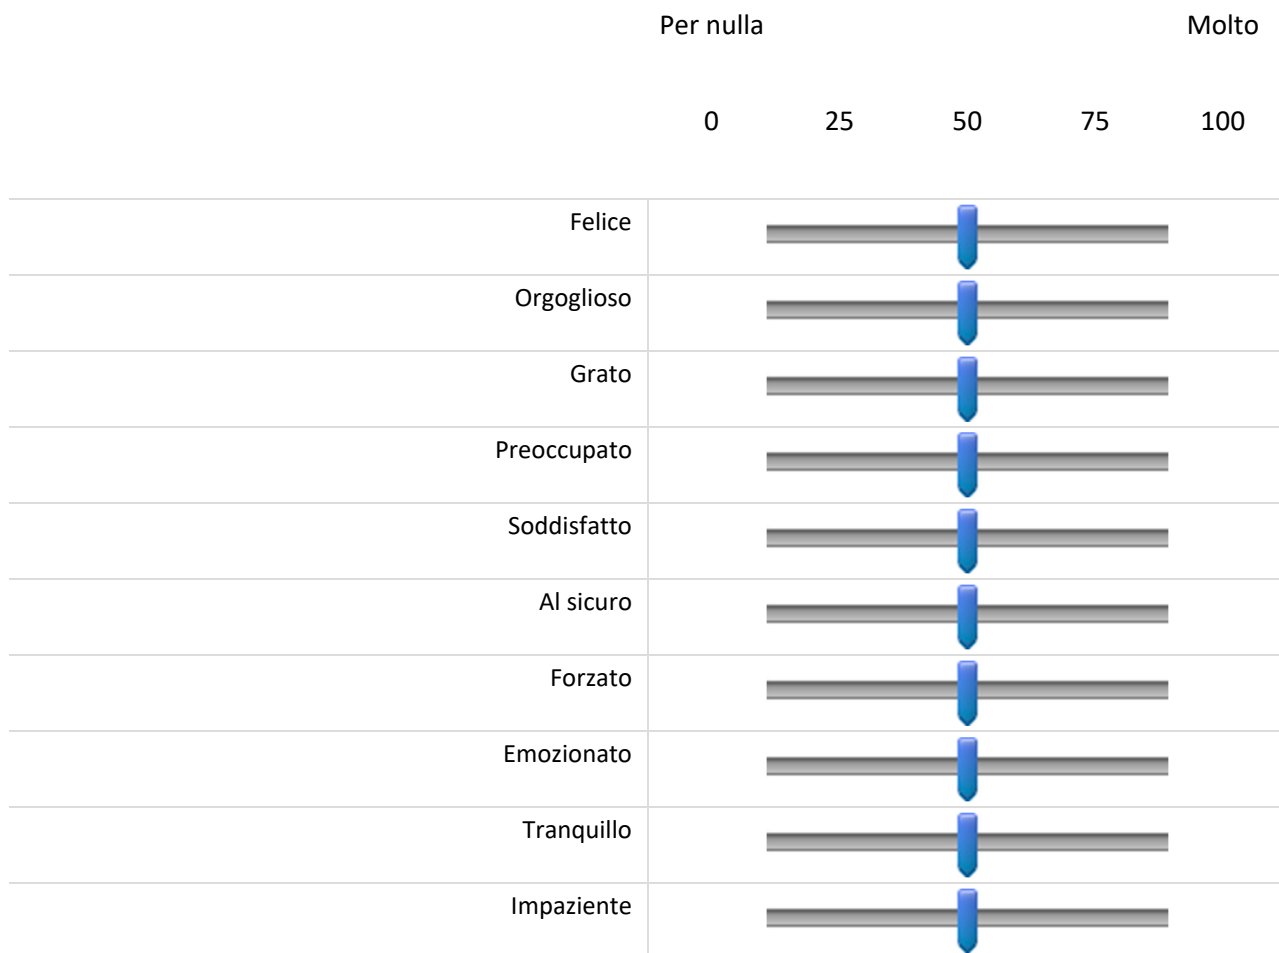

Supplement: s1 [file s1]
